# Supplementary material for: Parent-of-Origin Effects on Seed Size Modify Heterosis Responses in Arabidopsis thaliana
Source: Front Plant Sci. 2022 Mar 7;13:835219. doi: 10.3389/fpls.2022.835219 (PMC8940307; doi:10.3389/fpls.2022.835219)
Supplement: Supplementary Table 3 — MPH levels of reciprocal balanced (2x X 2x) and inter-ploidy hybrid crosses (2x X 4x, 4x X 2x). 2xA (diploid accession), 2xL (2x Ler-0), 4xL (4x Ler-0). N/A, not available due to triploid block. [file Table_3.XLSX]

## Sheet: Sheet1
Accession	%MPH 2xA x 2xL	%MPH 2xL X 2xA	%MPH 2xA X 4xL	%MPH 4xL X 2xA
Copac-1	11.611	8.3454	34.538	-37.8725
DraIV 6-13	3.1934	-1.1841	34.5479	-49.1565
Lago-1	1.8442	-4.8551	N/A	-43.0346
Ler-0	0	0	18.41	-35.66
