# Supplementary material for: Parent-of-Origin Effects on Seed Size Modify Heterosis Responses in Arabidopsis thaliana
Source: Front Plant Sci. 2022 Mar 7;13:835219. doi: 10.3389/fpls.2022.835219 (PMC8940307; doi:10.3389/fpls.2022.835219)
Supplement: Supplementary Table 4 — Deviations from the mid-parent value (MPV) in F1 hybrid diploids and triploids. Data represents the mean F1 seed size. Asterisks represent significant differences between the F1 hybrids and the MPV (‘****’ and ‘*’ indicate statistical significance at p-value < 0.0001 and p-value < 0.05, respectively, determined by Student’s t-test. Ns, not significant). N/A, not available due to triploid block. [file Table_4.XLSX]

## Sheet: Sheet1
	2x		3xp		3xm
cross	MPV	F1 Hybrid	MPV	F1 Hybrid	MPV	F1 Hybrid
Ler-0 X Copac-1	0.1364	0.1493 ****	0.1455	0.1973 ****	0.1455	0.0911 ****
Copac-1 X Ler-0		0.1538 ****
Ler-0 X DraIV 6-13	0.1378	0.1377 ns	0.1474	0.1994 ****	0.1474	0.0753 ****
DraIV 6-13 X Ler-0		0.1438 ****
Ler-0 X Lago-1	0.1328	0.1264 ****	0.1346	N/A	0.1346	0.0807 ****
Lago-1 X Ler-0		0.1353 *
